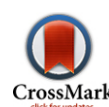

# Production of Carbon Occluded in Phytolith Is Season-Dependent in a Bamboo Forest in Subtropical China

Zhang-Ting Huang<sup>1</sup>, Pei-Kun Jiang<sup>1,2\*</sup>, Scott Xiaochuan Chang<sup>3\*</sup>, Yan Zhang<sup>1</sup>, Yu-Qi Ying<sup>1</sup>

**1** School of Environment and Resources, Zhejiang A&F University, Lin'an, Zhejiang, China, **2** Zhejiang Provincial Key Laboratory of Carbon Cycling in Forest Ecosystems and Carbon Sequestration, Zhejiang A&F University, Lin'an, Zhejiang, China, **3** Department of Renewable Resources, University of Alberta, Edmonton, Alberta, Canada

## Abstract

Carbon (C) occluded in phytolith (PhytOC) is a stable form of C; when PhytOC is returned to the soil through litterfall it is stored in the soil which can be an effective way for long-term C sequestration. However, few estimates on the rate of PhytOC input to the soil are available. To better understand the seasonal dynamics of PhytOC production and the annual rate of stable C sequestration through PhytOC input, we quantified the monthly litterfall, phytolith and PhytOC return to the soil over a year in a typical Lei bamboo (*Phyllostachys praecox*) forest in subtropical China. The monthly litterfall ranged between 14.81 and 131.18 g m<sup>-2</sup>, and the phytolith concentration in the monthly litterfall samples ranged between 47.21 and 101.68 g kg<sup>-1</sup> of litter mass, with the PhytOC concentration in the phytolith ranged between 29.4 and 44.9 g kg<sup>-1</sup> of phytolith, equivalent to 1.8–3.6 g kg<sup>-1</sup> of PhytOC in the litterfall (based on litterfall dry mass). The amount of phytolith input to the soil system was 292.21 ± 69.12 (mean ± SD) kg ha<sup>-1</sup> yr<sup>-1</sup>, sequestering 41.45 ± 9.32 kg CO<sub>2</sub>-e ha<sup>-1</sup> yr<sup>-1</sup> of C in the studied Lei bamboo forest. This rate of C sequestration through the formation of PhytOC found in this study falls within the range of rates for other grass-type species reported in the literature. We conclude that return of C occluded in phytolith to the soil can be a substantial source of stable soil C and finding means to increase PhytOC storage in the soil should be able to play a significant role in mitigating the rapidly increasing atmospheric CO<sub>2</sub> concentration.

**Citation:** Huang Z-T, Jiang P-K, Chang SX, Zhang Y, Ying Y-Q (2014) Production of Carbon Occluded in Phytolith Is Season-Dependent in a Bamboo Forest in Subtropical China. PLoS ONE 9(9): e106843. doi:10.1371/journal.pone.0106843

**Editor:** Shibu Jose, University of Missouri, United States of America

**Received:** May 4, 2014; **Accepted:** August 5, 2014; **Published:** September 4, 2014

**Copyright:** © 2014 Huang et al. This is an open-access article distributed under the terms of the Creative Commons Attribution License, which permits unrestricted use, distribution, and reproduction in any medium, provided the original author and source are credited.

**Data Availability:** The authors confirm that all data underlying the findings are fully available without restriction. All relevant data are within the paper.

**Funding:** The authors wish to acknowledge the funding from the Natural Science Foundation of China (No. 31270667), and the key Fund of Science and Technology of Zhejiang Province (No. LZ12C16003). The funders had no role in study design, data collection and analysis, decision to publish, or preparation of the manuscript.

**Competing Interests:** The authors have declared that no competing interests exist.

\* Email: jiangpeikun@zafu.edu.cn (PKJ); scott.chang@ualberta.ca (SXC)

## Introduction

Phytolith, or plantstones or plant opal, is a noncrystalline form of mineral (SiO<sub>2</sub>) that deposits in the intra- and extra-cellular structures of different plant tissues after the absorption of soluble silica by plant roots in the form of monosilicic acid (Si(OH)<sub>4</sub>) [1–3]. Phytolith is essentially a silicified feature that forms as a result of biomineralization that occurs within plants and during the process some organic C can become occluded in the phytolith (PhytOC) during its formation in plant tissues [2,4]. Phytolith typically is highly resistant to decomposition [5,6], being stable in both aerobic and anaerobic conditions and in soils with pH ranging between 3.5 and 9.8 [7,8]. As such, the PhytOC is much more stable than organic C fractions in the soil that are not occluded in phytolith [2,9]. When plant litter decomposes after it falls onto the soil, PhytOC as a stable form of C will accumulate with phytolith and remain in the soil for a long period of time [2]. The accumulation of PhytOC in the soil is an important millennium scale mechanism for long-term C sequestration in terrestrial ecosystems, which could potentially contribute 15–37% of the estimated global soil organic C (SOC) sequestration of 24 kg C ha<sup>-1</sup> yr<sup>-1</sup>; this form of C sequestration could play a positive role in mitigating global climate change [2,5,10,11].

Despite the potential importance of phytolith in SOC stabilization and long-term C storage, few estimates exist on the

concentration of phytolith in different plant species and ecosystem types [12–14]. Measurements of phytolith and PhytOC concentrations in different ecosystem types are urgently needed to improve our understanding of the potential contribution of PhytOC in global C sequestration [15]. Such data would also help us design management practices, such as the selection of species or genotypes that have high phytolith concentrations, to take advantage of this mechanism for SOC sequestration to reduce atmospheric CO<sub>2</sub> concentration [16].

Past research indicates that plants in the Poaceae family, a large and nearly ubiquitous family consisting of monocotyledonous flowering plants, have relatively high phytolith concentrations [3,17]. Among the more than 10,000 species in the Poaceae family, bamboo species have particularly high phytolith concentrations in their tissues [3]. Plants in the Poaceae family thus have an advantage in sequestering organic C in the form of PhytOC accumulation in the soil [2,5,11,12,15,18]. Through the determination of phytolith and PhytOC concentrations in different bamboo species, combined with the published bamboo litterfall rate [19,20], Parr et al. [15] estimated the organic C sequestration potential through PhytOC accumulation in bamboo forests of ten economically important bamboo species. They concluded that the global contribution to C sequestration on an annual basis is equivalent to 11% of the anthropogenic CO<sub>2</sub> release [15]. The

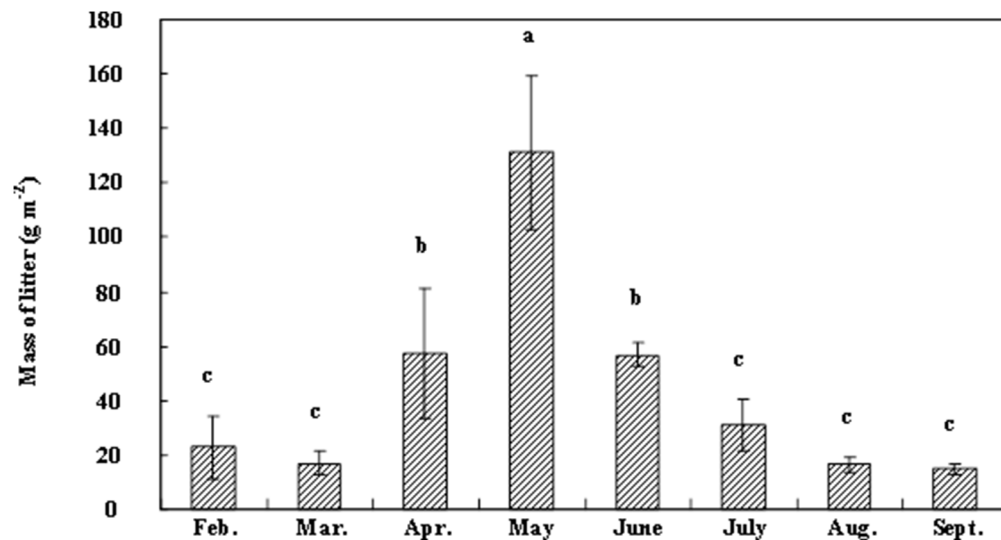

**Figure 1. Seasonal dynamics of litter fall mass (oven-dry basis) in a Lei bamboo forest in subtropical China.** Vertical error bars are standard deviations. Means followed by different lowercase letters are not significantly different.  
doi:10.1371/journal.pone.0106843.g001

work of Parr et al. [15] and others [16] illustrated the advantage of bamboo forests in long-term C sequestration through the formation of PhytOC. However, one potential deficiency with the work of Parr et al. [15] is that the PhytOC contribution was estimated by its content in bamboo leaves rather than through their existence in the litterfall or in the soil. In reality, only PhytOC returned to the soil through litterfall and accumulated in the soil can be considered a contribution to SOC sequestration. The most reliable estimate of the rate of PhytOC input is through quantifying litterfall rate and the PhytOC concentration in the litterfall [16]. Since PhytOC return in litterfall constitutes PhytOC return to the soil, the seasonal dynamics of PhytOC return in litterfall should be understood but that has not been studied.

In this study, we determined the annual rate of PhytOC input to the soil in a Lei bamboo forest in subtropical China through measuring the amount of litterfall and the PhytOC concentration in the litterfall to provide an estimate of the potential contribution of C sequestration in the form of PhytOC input to the soil, as well as the seasonal dynamics of PhytOC input to the soil. Lei bamboo belongs to the Bambusoideae subfamily in the Poaceae family and is a species with high economic value due to the production of bamboo shoot, a widely used delicacy in Southeast Asia. This species is widely planted in southern China and the area planted to this bamboo species has increased dramatically in the last several decades [21]. As such, studying the rate of PhytOC production in Lei bamboo forests can improve our understanding of the potential contribution of this form of C sequestration in Lei bamboo forests and should have implications for estimating PhytOC input to the soil in forests of other bamboo species. The objectives of this study were therefore to determine the amount of litterfall and the associated PhytOC input to a Lei bamboo forest on a seasonal basis to understand the dynamics of both litterfall and PhytOC input through monthly sampling of the studied bamboo forest and to understand the contribution of PhytOC input from other bamboo components and obtain ecosystem level PhytOC storage and compare that with PhytOC storage in other ecosystems reported in the literature. Specifically, we hypothesize that 1) PhytOC production through litterfall in bamboo forests has a strong seasonal pattern and 2) the annual PhytOC return to the soil is a substantial contribution to soil C sequestration particularly

as compared to rates of soil C sequestration in different ecosystems reported in the literature.

## Materials and Methods

### Ethics statement

No specific permits were required for the described field studies involving the collection of litterfall samples from the studied bamboo forest. The bamboo forest used in our sampling was privately owned and was not protected in any way and thus a specific permit for not-for-profit research is not required. The field studies did not involve endangered or protected plant or animal species in the study area.

### Study area

The study site was located in Congkeng Village in Shankou Township (30°14'N, 119°42'E), Lin'an City, Zhejiang Province, in southeast China. The elevation of the site was 150 m above sea level and the general local landform was dominated by low hills. The study area had a monsoonal subtropical climate with four distinct seasons with hot and humid summers and cold winters. The average annual temperature and average annual precipitation of the study site were 16°C and 1414 mm, respectively, based on the climate data between 2000 and 2009, with most of the precipitation occur between April and October. The site had an average of 236 frost-free days and 1946 day-light hours. The soils of the experimental area were classified as Anthrosols in the FAO soil classification system [22].

The site selected for this study had the bamboo forest established 10 years ago, with Lei bamboo density at 2,045 stems ha<sup>-1</sup> and a diameter at breast height (1.3 m from the ground) of 3.9 cm. Those bamboo forests were managed for bamboo shoot production, a form of bamboo forest management that yields a high economic return [21]. The studied bamboo forest was converted from rice paddy in 2001, 10 years before this study was initiated in 2011. The bamboo forest was intensively managed as described in Li et al. [21].

**Table 1.** Carbon, SiO<sub>2</sub>, phytolith and PhytOC concentrations (or stocks), and PhytOC fluxes through litter fall in a Lei bamboo stand in different months.

| Months        | Litter biomass<br>(g m <sup>-2</sup> ) | C concentration<br>(g kg <sup>-1</sup> ) | SiO <sub>2</sub> concentration<br>(g kg <sup>-1</sup> ) | Phytolith<br>concentration<br>(g kg <sup>-1</sup> ) | PhytOC in<br>phytolith (g<br>kg <sup>-1</sup> ) | PhytOC in<br>litter (g<br>kg <sup>-1</sup> ) | Phytolith stock<br>(kg ha <sup>-1</sup> yr <sup>-1</sup> ) | PhytOC stock<br>(kg ha <sup>-1</sup> yr <sup>-1</sup> ) | PhytOC fluxes<br>(kg CO <sub>2</sub> -e ha <sup>-1</sup><br>yr <sup>-1</sup> ) |
|---------------|----------------------------------------|------------------------------------------|---------------------------------------------------------|-----------------------------------------------------|-------------------------------------------------|----------------------------------------------|------------------------------------------------------------|---------------------------------------------------------|--------------------------------------------------------------------------------|
| February      | 22.95±11.56 c                          | 457.27±5.53 bc                           | 76.55±8.91 bc                                           | 77.16±7.48 c                                        | 29.4±9.1 b                                      | 2.2±0.6 c                                    | 1821±10.11 cd                                              | 0.51±0.32 c                                             | 1.86±1.19 c                                                                    |
| March         | 17.00±4.17 c                           | 451.76±2.16 cd                           | 88.74±5.13 ab                                           | 88.09±3.42 bc                                       | 35.9±11.5 ab                                    | 3.2±1.1 ab                                   | 14.99±3.75 cd                                              | 0.52±0.15 c                                             | 1.90±0.55 c                                                                    |
| April         | 57.25±23.81 b                          | 442.13±3.32 e                            | 91.93±6.98 a                                            | 101.68±6.99 a                                       | 34.6±4.3 ab                                     | 3.5±0.5 a                                    | 58.00±23.92 b                                              | 1.95±0.67 b                                             | 7.15±2.45 b                                                                    |
| May           | 131.18±28.24 a                         | 444.43±7.51 de                           | 83.29±14.51 ab                                          | 90.37±15.03 ab                                      | 40.4±3.2 a                                      | 3.6±0.6 a                                    | 121.59±48.45 a                                             | 4.89±1.88 a                                             | 17.94±6.88 a                                                                   |
| June          | 56.89±4.45 b                           | 446.98±11.41 de                          | 67.96±2.75 c                                            | 80.78±3.28 bc                                       | 43.6±2.4 a                                      | 3.5±0.2 a                                    | 45.88±2.47 bc                                              | 2.00±0.15 b                                             | 7.33±0.54 b                                                                    |
| July          | 31.01±9.64 c                           | 463.03±5.53 b                            | 39.24±11.07 d                                           | 53.61±7.49 d                                        | 44.9±3.8 a                                      | 2.4±0.5 bc                                   | 17.00±7.06 cd                                              | 0.77±0.36 c                                             | 2.81±1.31 c                                                                    |
| August        | 16.52±2.72 c                           | 476.42±4.34 a                            | 45.69±2.44 d                                            | 47.21±3.81 d                                        | 38.7±8.0 ab                                     | 1.8±0.2 c                                    | 7.86±1.75 d                                                | 0.30±0.05 c                                             | 1.09±0.17 c                                                                    |
| September     | 14.81±2.29 c                           | 472.52±3.49 a                            | 47.93±4.70 d                                            | 58.68±7.89 d                                        | 43.9±5.7 a                                      | 2.5±0.2 bc                                   | 8.70±1.88 d                                                | 0.38±0.06 c                                             | 1.38±0.21 c                                                                    |
| Total/Average | 347.61±41.16                           | /                                        | /                                                       | /                                                   | 38.9±1.4                                        | 2.9±0.2                                      | 292.21±69.12                                               | 11.30±2.54                                              | 41.45±9.32                                                                     |

Values are means and SD. Means followed by the same lowercase letters in a column are not different among the month of litter collection.  
doi:10.1371/journal.pone.0106843.t001

## Experimental design and sampling

Four randomly selected sampling sites were established in the bamboo forest described earlier. One 10×10 m plot was set up within each site and within each plot we set up four 1×1 m litter traps. Litter samples were collected on a monthly basis between January and December 2011. At each litter sample collection, the sample in each litter trap was transferred to a plastic bag, brought back to the laboratory, weighed, dried and weighed again. Water content was determined from those weights. The dried samples were ground and stored for chemical analysis. The main objective of this part of the study was to understand the seasonal dynamics of PhytOC return to the soil through bamboo litter fall.

In the second part of this research, we determined the biomass of standing bamboo in the bamboo stand we studied and compared that to the bamboo leaf litter production determined in the first part of the research described above. The main objective was to understand the partition of PhytOC in different bamboo components and compare that with bamboo leaf litter. This would also allow us to compare the ecosystem level PhytOC content with other ecosystems reported in the literature. In this part of the research, four sites were selected in 2012 in the studied stand after the new bamboo shoots produced in the spring were fully grown to a bamboo plant in late June. In each site, one 10×10 m plot was established. Within each plot, all bamboo plants were surveyed, with their average diameter and density, and grouped based on their age (all bamboo plants were from one to four years of age). After the field measurement was complete, three bamboo plants of each of the four ages representing a diameter gradient were harvested to determine the bamboo leaf biomass for each of those bamboo plants. The bamboo leaf samples from the three bamboo plants of each age were then mixed and 1 kg of each of those samples was collected and brought back to the laboratory. Once in the laboratory, the bamboo leaf samples were washed with deionized water, dried at 105°C for about an hour to quickly remove the majority of the water, and the samples were then dried at 65°C to constant weight to determine the water content of the leaf samples. The samples were ground and the phytolith and PhytOC concentrations determined using the methods described below.

The C and nitrogen (N) concentrations in the litter samples were determined based on a dry combustion method using an Elementar Vario MAX CN analyzer (Elementar Analysensysteme GmbH, Hanau, Germany). A microwave digestion method was used in this study to isolate phytolith from the litter samples [23]. After the microwave digestion, the samples were treated with a Walkley-Black type digestion [24] to ensure that extraneous organic materials in the samples were completely removed in recovering the phytolith sample [15]. The isolated phytolith samples were oven-dried at 75°C for 24 h in a centrifuge tube of known weight and the quantity of phytolith recovered was determined. The C concentration in the phytolith samples was then analysed on a Thermo Finnigan Flash EA 1112 CHNS-O Analyser (Thermo Finnigan, San Jose, CA). A soil standard sample (GBW07405) and a plant standard sample (GBW07602) were included in the analysis as part of the quality control measures. Precisions of better than 5% in the measurement of phytolith and better than 8% in the measurement of C concentration in phytolith were achieved through analysis of duplicate samples.

## Data analysis

The phytolith concentration in litterfall samples, the C concentration in the phytolith, and the PhytOC concentration in litterfall samples were calculated using the following formulas:

**Table 2.** Biomass, phytolith and PhytOC concentrations and content (or stock), and PhytOC fluxes in fresh leaves in a Lei bamboo stand.

| Age of leaf (yr) | Biomass (t ha <sup>-1</sup> yr <sup>-1</sup> ) | Phytolith Concentration (g kg <sup>-1</sup> ) | PhytOC in phytolith (g kg <sup>-1</sup> ) | Phytolith stock (kg ha <sup>-1</sup> yr <sup>-1</sup> ) | PhytOC stock (kg ha <sup>-1</sup> yr <sup>-1</sup> ) | PhytOC fluxes (kg CO <sub>2</sub> -e ha <sup>-1</sup> yr <sup>-1</sup> ) |
|------------------|------------------------------------------------|-----------------------------------------------|-------------------------------------------|---------------------------------------------------------|------------------------------------------------------|--------------------------------------------------------------------------|
| 1                | 0.06±0.02 c                                    | 9.91±3.10 d                                   | 60.03±1.7 a                               | 0.54±0.07 b                                             | 0.03±0.003 c                                         | 0.12±0.01 c                                                              |
| 2                | 2.09±0.63 a                                    | 21.58±3.95 c                                  | 56.03±5.2 a                               | 44.53±13.43 a                                           | 2.46±0.59 a                                          | 9.03±2.18 a                                                              |
| 3                | 0.94±0.51 b                                    | 31.29±5.68 b                                  | 57.30±17.5 a                              | 27.46±10.64 a                                           | 1.49±0.40 b                                          | 5.45±1.48 b                                                              |
| 4                | 0.70±0.29 bc                                   | 41.33±8.38 a                                  | 51.18±4.4 a                               | 29.32±13.82 a                                           | 1.54±0.82 b                                          | 5.64±3.02 b                                                              |
| Total            | 3.79±1.01                                      | /                                             | /                                         | 101.86±22.67                                            | 5.52±1.36                                            | 20.24±4.99                                                               |

Values are means and SD. Means followed by same lowercase letters in a column are not different among the ages of leaves.

doi:10.1371/journal.pone.0106843.t002

1) *Litterfall phytolith concentration (g kg<sup>-1</sup>)*

$$= \frac{\text{Phytolith weight (g)}}{\text{Litterfall weight (kg)}}$$

2) *C concentration in phytolith (g kg<sup>-1</sup>)*

$$= \frac{\text{C content in phytolith (g)}}{\text{Phytolith weight (kg)}}$$

3) *PhytOC concentration in litterfall samples (g kg<sup>-1</sup>)*

$$= \frac{\text{C content in phytolith (g)}}{\text{Litterfall weight (kg)}}$$

The PhytOC addition rate from litterfall was calculated by multiplying the litterfall weight, the phytolith concentration and the C concentration in phytolith or by multiplying the litterfall weight and the PhytOC concentration in litterfall samples.

The normality and homogeneity of variance were tested before performing the ANOVA analysis and data were log-transformed if the assumptions for ANOVA were not met. An one-way analysis of variance (ANOVA) was conducted to test the effect of sampling month on the amount of litterfall, SOC concentration in the litterfall, and phytolith concentration, C concentration in phytolith and the PhytOC concentration in the litterfall. When the ANOVA analysis indicated a significant treatment effect, the Duncan's new multiple range test (MRT) was used to separate the means. Correlation analysis was performed to evaluate relationships between the studied parameters. An alpha level of 0.05 for significance was used in all statistical analyses, unless mentioned otherwise. All of the statistical analyses were performed using the SPSS software (SPSS 18.0 for windows, SPSS Inc., Chicago, USA).

## Results

The amount of litterfall collected in each month was quite variable, with litterfall rates ranging from 14.81 to 131.18 g m<sup>-2</sup>. The rates of litterfall were greater between April and June than in other months of the year, with the greatest litterfall rate obtained in May (Fig. 1). No litterfall was collected between October and

**Table 3.** PhytOC fluxes associated with different plant species based on data from the literature.

| Plant species                 | PhytOC in phytolith (g kg <sup>-1</sup> ) | PhytOC in biomass (g kg <sup>-1</sup> ) | Biomass (t ha <sup>-1</sup> yr <sup>-1</sup> ) | PhytOC fluxes (t CO <sub>2</sub> -e ha <sup>-1</sup> yr <sup>-1</sup> ) | Reference  |
|-------------------------------|-------------------------------------------|-----------------------------------------|------------------------------------------------|-------------------------------------------------------------------------|------------|
| Lei bamboo (litter)           | 38.9±1.4                                  | 2.9±0.2                                 | 3.48±0.41                                      | 0.042±0.009                                                             | This study |
| Sugarcane                     | 38.8~192.6                                | 0.9~2.5                                 | 40                                             | 0.123~0.364                                                             | [13]       |
| Economic bamboo species       | 16.0~40.2                                 | 2.4~5.2                                 | 1~37                                           | 0.008~0.709                                                             | [12]       |
| Foxtail millet                | 25.1±12.7                                 | 1.4±0.7                                 | 4.09                                           | 0.020±0.010                                                             | [8]        |
| Common millet                 | 19.2±14.3                                 | 1.3±0.9                                 | 4.79                                           | 0.023±0.015                                                             | [8]        |
| Wheat                         | 13.0~129.0                                | 0.6~6.0                                 | 2.10~11.20                                     | 0.006~0.246                                                             | [14]       |
| Rice                          | 14.2~33.6                                 | 0.4~2.8                                 | 9.30~18.60                                     | 0.030~0.130                                                             | [24]       |
| Riparian plants               | 4.9~39.7                                  | 0.1~1.6                                 | 0.01~11.50                                     | 0.052~23.562                                                            | [25]       |
| Shallow-water emergent plants | 11.0~23.3                                 | 0.1~1.5                                 | 16.00~34.06                                    | 3.775~159.359                                                           | [25]       |
| Floating-leaf aquatic plants  | 9.1~19.4                                  | 0.2~0.4                                 | 0.46~99.18                                     | 0.320~87.278                                                            | [25]       |

Values represent the range or mean±SD.

doi:10.1371/journal.pone.0106843.t003

January. The total amount of litterfall in the study year was  $347.61 \text{ g m}^{-2}$ .

The C concentration in the litterfall samples did not change dramatically between the sampling months but tended to be higher in late fall than in spring or summer (Table 1). The  $\text{SiO}_2$  concentration in the litterfall samples markedly changed with the month of litterfall sample collection, with the highest concentrations found in late winter/early spring and the lowest in the summer growing season (Table 1). The seasonal change in the PhytOC concentration in the phytolith was not consistent with the seasonal change of the phytolith concentration in the litter samples, with a non-significant negative correlation between the two ( $R^2 = 0.11$ ,  $P > 0.05$ ; data not shown). When the PhytOC contained in the litter sample was expressed on the basis of the litter biomass (Table 1), the PhytOC concentration was positively correlated with the phytolith concentration ( $R^2 = 0.51$ ,  $P < 0.01$ ; data not shown).

The monthly amount of phytolith and PhytOC returned to the soil through litterfall (Table 1) was highly correlated ( $R^2 = 0.98$ ,  $P < 0.01$ ; data not shown). The total amount of PhytOC returned to the soil through litterfall was  $11.30 \text{ kg ha}^{-1} \text{ yr}^{-1}$ , the equivalent of removing  $41 \text{ kg of CO}_2 \text{ ha}^{-1} \text{ yr}^{-1}$ .

The total bamboo green leaf biomass in the studied bamboo stand was  $3.79 \text{ ton ha}^{-1}$  (Table 2), which was slightly greater than the  $3.48 \text{ ton ha}^{-1}$  of the annual bamboo leaf litter determined (Table 1). The phytolith contained in the green bamboo leaf was only  $101.86 \text{ kg ha}^{-1}$  (Table 2), far less than the  $292.21 \text{ kg ha}^{-1}$  that can be returned to the soil through litterfall (Table 1). Consistent with the phytolith content in the standing bamboo leaves, the amount of PhytOC that was contained in the green bamboo leaf was also substantially less than that contained in the bamboo leaf litter.

## Discussion

With the continued increase of greenhouse gas concentrations in the atmosphere and the related increase of the climatic forcing [25], the need to enhance C sequestration through biological means to mitigate the increasing greenhouse gas concentrations is becoming more urgent [26]. One of the main ways to biologically increase C sequestration is to increase C storage in the soil. The soil stores a vast amount of organic C and has the capacity to store more. However, organic C storage in the soil has different residence times and some of the SOC is very vulnerable to loss through mineralization under the actions of microbial populations in the soil [27,28]. Mechanisms for long-term SOC preservation in terrestrial ecosystems include physical protection of chemically recalcitrant organic matter within organo-mineral complexes [29], formation of charcoal [30], and organic C occlusion in phytolith [2]. The last mechanism has recently been promoted as a potential means to increase the long-term storage of SOC as PhytOC is considered a highly stable C that can be stored in the soil for hundreds of years [13–16].

The strong seasonal variation in PhytOC concentration in litterfall samples (Table 1) in the studied bamboo forest supported our first hypothesis. Such seasonal variations are to be expected as the litterfall may be consisted of leaves formed in different years and PhytOC concentrations in leaves change with leaf age [31–33]. Our own work also supports the literature data that PhytOC concentrations are dependent on the age of the leaf (Table 2). The implication of this is that we need to collect litter samples throughout the year to obtain accurate information about PhytOC production in bamboo forest ecosystems.

This is one of the first papers that report PhytOC concentrations in litter samples and the contribution of litterfall to the return of PhytOC to the soil [16]. Most earlier determinations on the contribution of plant species to ecosystem C sequestration through PhytOC production was based on estimates of PhytOC concentrations in green leaf samples [9,13,14,34]. This paper demonstrates that the input of PhytOC to the soil through litterfall is much greater than estimates derived from leaf biomass and PhytOC concentrations in green leaf (Tables 1 and 2) [15]. Our data indicate that the PhytOC input to the soil estimated using the method in Parr et al. [15] using phytolith concentrations in green leaves can be quite different from PhytOC input measurements based on leaf litter input and PhytOC concentrations in leaf litters. Those differences are likely caused by the different sampling times of the plant samples used for analysis of PhytOC concentrations, as phytolith concentrations increase with plant age [31–33]; as a result of that, the PhytOC concentrations in the leaf litter (the oldest leaves on a plant) should be higher than that in the green leaves, as was demonstrated in this study (Tables 1 and 2). Therefore, determining the amount of litterfall and the PhytOC concentration in the litterfall is a more accurate method to quantifying the PhytOC return to the soil in bamboo forest ecosystems.

The large difference in the PhytOC concentration between the bamboo leaf and bamboo leaf litter resulted in the two-time difference in the amount of C that can be sequestered in the form of PhytOC that were estimated through the two methods. This indicates that the amount of C sequestration in the form of PhytOC in previous publications (e.g., [15]) that were based on PhytOC concentrations in green leaves would represent an underestimate. If we follow the same approach used in Parr et al. [15] and consider that the global potential land that can be cultivated ( $4.1 \times 10^9 \text{ ha}$ ) is planted to bamboo or plant species with similar PhytOC production potential, the global potential to sequester atmospheric  $\text{CO}_2$  is going to be greater than the 11% of the current global  $\text{CO}_2$  emissions suggested by Parr et al. [15].

We reviewed the literature and summarized the silicon and phytolith concentrations, biomass production, and the C sequestration potentials (expressed as  $\text{CO}_2$  equivalent) of various plant species known to have high abilities to form phytolith (Table 3). The literature data indicate that silicon concentrations in plant biomass are variable, with the highest silicon concentrations reported in sugarcane plants. Silicon concentrations in wheat, bamboo, rice and some aquatic plants can also be high. The highest PhytOC concentration is also reported in sugarcane, followed by wheat, bamboo and rice. The  $11.30 \text{ kg ha}^{-1} \text{ yr}^{-1}$  of PhytOC returned to the soil through litterfall (equivalent to the removal of  $41 \text{ kg of CO}_2 \text{ ha}^{-1} \text{ yr}^{-1}$ ) supported our second hypothesis that the amount of annual PhytOC return to the soil is a substantial contribution to soil C sequestration. The C sequestration potential through PhytOC formation of the bamboo forest we studied falls within the range reported in other grass-type species [11–15,18]. The literature data indicate that the C sequestration potential through PhytOC formation was high in some aquatic plant species [14]. Despite that the PhytOC concentrations in different plant species in the Poaceae family are not dramatically different, the PhytOC production potential can be quite different largely because of the large differences in biomass production (Table 3).

For most economically important bamboo species, only bamboo leaf litter will be returned to the soil while bamboo stem, which would constitute the majority of biomass production in a bamboo forest, would be exported out of the ecosystem as an economic product that can be used for making furniture or other products.

Eventually, the PhytOC contained in those bamboo parts would be returned to the broader ecosystem and still contribute to C removal from the atmosphere [35]. Therefore, by only assessing the PhytOC content in the soil [36] and the contribution of PhytOC through litterfall [15] will substantially underestimate the potential for C sequestration in bamboo forests. Full accounting of the PhytOC sequestration potential of bamboo forests at the ecosystem level will be required to fully understand their C sequestration potential.

In summary, the production of litterfall and the concentration of phytOC in the litterfall should be used to calculate the potentials of bamboo forests for stable C sequestration in the form PhytOC. The PhytOC concentration in litterfall had seasonal variations and thus representative seasonal litter samples should be collected for analysis to provide more accurate estimates of the potential for PhytOC formation and climate change mitigation. PhytOC production can make a substantial contribution to long-term C

sequestration in the studied bamboo forest. In estimating the contribution of PhytOC production for C sequestration in bamboo forests, PhytOC removal in the form of bamboo products from the ecosystem should also be considered.

## Acknowledgments

Assistance from Professor Yongfu Li in the preparation of this manuscript is acknowledged.

## Author Contributions

Performed the experiments: ZTH PKJ. Analyzed the data: ZTH PKJ. Contributed to the writing of the manuscript: ZTH PKJ SXC. Supervised the project: PKJ. Assisted in the interpretation of the data: SXC. Participated in data collection: YZ YQY. Discussed the results and commented on the contents of the manuscript: ZTH PKJ SXC YZ YQY.

## References

- Piperno DR, Pearsall DM (1993) Phytoliths in the reproductive structures of maize and teosinte - implications for the study of maize evolution. *J Archaeol Sci* 20: 337–362.
- Parr JF, Sullivan LA (2005) Soil carbon sequestration in phytoliths. *Soil Biol Biochem* 37: 117–124.
- Wang YJ, Lu HY (1993) *Phytolith Study and Its Application*. Beijing: Ocean Press.
- Jones L, Milne AA (1963) Studies of silica in the oat plant. *Plant Soil* 18: 207–220.
- Wilding LP (1967) Radiocarbon dating of biogenetic opal. *Science* 156: 66–67.
- Santos GM, Alexandre A, Coe HHG, Reyerson PE, Southon JR, et al. (2010) The phytolith  $^{14}\text{C}$  puzzle: a tale of background determinations and accuracy tests. *Radiocarbon* 52: 113–128.
- Wilding LP, Drees LR (1974) Contributions of forest opal and associated crystalline phases to fine silt and clay fractions of soils. *Clays Clay Min* 22: 295–306.
- Wang YJ, Lu HY, Lu HB, Tan DR, Huang L (1992) Phytolith and its importance in casting molds and braised soil from ancient China. *Chin Sci Bull* 37: 342–345.
- Song ZL, Liu HY, Si Y, Yin Y (2012) The production of phytoliths in China's grasslands: implications to the biogeochemical sequestration of atmospheric  $\text{CO}_2$ . *Glob Change Biol* 18: 3647–3653.
- Wilding LP, Brown RE, Holowaychuk N (1967) Accessibility and properties of occluded carbon in biogenetic opal. *Soil Sci* 103: 56–61.
- Zuo XX, Lü HY (2011) Phytoliths analysis for the discrimination of foxtail millet (*Setaria italica*) and common millet (*Panicum miliaceum*). *Chin Sci Bull* 56: 3451–3456.
- Parr JF, Sullivan LA (2011) Phytolith occluded carbon and silica variability in wheat cultivars. *Plant Soil* 342: 165–171.
- Li ZM, Song ZL, Parr JF, Wang HL (2013) Occluded C in rice phytoliths: implications to biogeochemical carbon sequestration. *Plant Soil* 370: 615–623.
- Li Z, Song Z, Jiang P (2013) Biogeochemical sequestration of carbon within phytoliths of wetland plants: A case study of Xixi wetland, China. *Chin Sci Bull* 58: 2480–2487.
- Parr JF, Sullivan LA, Chen BH, Ye GF, Zheng WP (2010) Carbon bio-sequestration within the phytoliths of economic bamboo species. *Glob Change Biol* 16: 2661–2667.
- Huang ZT, Li YF, Jiang PK, Chang SX, Song ZL, et al. (2014) Long-term mulching increased carbon occluded in phytolith (PhytOC) in soils of intensively managed bamboo forests. *Sci Rep* 4: 3602.
- Hodson MJ, White PJ, Mead A, Broadley MR (2005) Phylogenetic variation in the silicon composition of plants. *Ann Bot* 96: 1027–1046.
- Parr JF, Sullivan LA, Quirk R (2009) Sugarcane phytoliths: Encapsulation and sequestration of a long-lived carbon fraction. *Sugar Tech* 11: 17–21.
- Kleinhenz V, Midmore DJ (2001) Aspects of bamboo agronomy. *Adv Agron* 74: 99–153.
- He DJ, Hong W, Wu CT, Lan B, Huang H, et al. (2002) Study on biomass and energy distribution of natural *Phyllostachys heterocycla* cv. *Pubescens* in Wuyi Mountains and its comparison with high-yield forest. *Acta Botanica Boreali-occidentalia Sinica* 23: 291–296.
- Li YF, Zhang JJ, Chang SX, Jiang PK, Zhou GM, et al. (2013) Long-term intensive management effects on soil organic carbon pools and chemical composition in Moso bamboo (*Phyllostachys pubescens*) forests in subtropical China. *For Ecol Manage* 303: 121–130.
- WRB (World Reference Base for Soil Resources) (2006) A Framework for International Classification, Correlation and Communication. Food and Agriculture Organization of the United Nations, Rome.
- Parr JF, Dolic V, Lancaster G, Boyd WE (2001) A microwave digestion method for the extraction of phytoliths from herbarium specimens. *Rev Palaeobot Palynology* 116: 203–212.
- Walkley A, Black IA (1934) An examination of the Degtjareff method for determining soil organic matter, and a proposed modification of the chromic acid titration method. *Soil Sci* 37: 29–38.
- Nisbet EG, Dlugokencky EJ, Bousquet P (2014) Methane on the rise—again. *Science* 343: 493–495.
- Avinash J, Negi MS (2010) Adaptation and mitigation options in the forestry sector and climate change. *J Trop For* 26: 18–22.
- Sollins P, Swanston C, Kramer M (2007) Stabilization and destabilization of soil organic matter—a new focus. *Biogeochemistry* 85: 1–7.
- Lal R (2009) Challenges and opportunities in soil organic matter research. *European Journal of Soil Science* 60: 158–169.
- Post WM, Kwon KC (2000) Soil carbon sequestration and land-use change: processes and potential. *Glob Change Biol* 6: 317–327.
- Skjemstad JO, Clarke P, Taylor JA, Oades JM, McClure SG (1996) The chemistry and nature of protected carbon in soil. *Aust J Soil Res* 34: 251–271.
- Ma JF, Takahashi E (2002) Functions of silicon in plant growth. In: *Soil, fertilizer, and Plant Silicon Research in Japan*, 1st edn. Elsevier Science, Amsterdam, The Netherlands. 107–180.
- Ma JF, Yamaji N (2008) Functions and transport of silicon in plants. *Cell Mol Life Sci* 65: 3049–3057.
- Hodson MJ, Sangster AG (1998) Mineral deposition in the needles of white spruce [*Picea glauca* (Moench.) Voss]. *Ann Bot* 82: 375–385.
- Song ZL, Liu HY, Li BL, Yang XM (2013) The production of phytolith-occluded carbon in China's forests: implications to biogeochemical carbon sequestration. *Glob Change Biol* 19: 2907–2915.
- Jansson C, Wulschleger SD, Kalluri UC, Tuskan GA (2010) Phytosequestration: Carbon biosequestration by plants and the prospects of genetic engineering. *BioScience* 60: 685–696.
- Zuo XX, Lu HY, Gu ZY (2014) Distribution of soil phytolith-occluded carbon in the Chinese Loess Plateau and its implications for silica-carbon cycles. *Plant Soil* 374: 223–232.
